# Supplementary material for: Gold nanocages with dual modality for image-guided therapeutics
Source: Royal Society of Chemistry journal article supplement (doi:10.1039/c7nr01350g), 2017-01-01
Supplement: c7nr01350g1.pdf [file c7nr01350g1.pdf]

Supporting Information for

# Gold Nanocages with Dual Modality for Image-Guided Therapeutics

*Shijin Bao,<sup>‡a</sup> Shengnan Huang,<sup>‡a</sup> Ying Liu,<sup>a</sup> Yurong Hu,<sup>\*a, b</sup> Weiping Wang,<sup>a</sup> Mengfei Ji,<sup>a</sup> Huili Li,<sup>a</sup> Ning Xia Zhang,<sup>a</sup> Chengzhi Song,<sup>c</sup> Shaofeng Duan,<sup>\*d, e</sup>*

<sup>a</sup> Key Laboratory of Targeting Therapy and Diagnosis for Critical Diseases, Henan Province; Collaborative Innovation Center of New Drug Research and Safety Evaluation, Henan Province, School of Pharmaceutical Sciences, Zhengzhou University, 100 Kexue Avenue, Zhengzhou 450001, P. R. China

<sup>b</sup> Key Laboratory of key technology of drug preparation, Ministry of Education, Institute of Drug Discovery & Development, Zhengzhou University, 100 Kexue Avenue, Zhengzhou 450001, P. R. China

<sup>c</sup> Zhengzhou Foreign Language School, Fengyang Street, Hi-Tech Development Zone, Zhengzhou, 450001, P. R. China

<sup>d</sup> Pharmaceutical College, Henan University, Jin Ming Avenue, Kaifeng, 475004, P. R. China

<sup>e</sup> The First Affiliated Hospital of Zhengzhou University, 1 Construction Road, Zhengzhou, 450052, P. R. China

<sup>#</sup>Shijin Bao and Shengnan Huang contribute equally to this study.

\* Corresponding author E-mail: [huyr@zzu.edu.cn](mailto:huyr@zzu.edu.cn); [sduan@henu.edu.cn](mailto:sduan@henu.edu.cn).

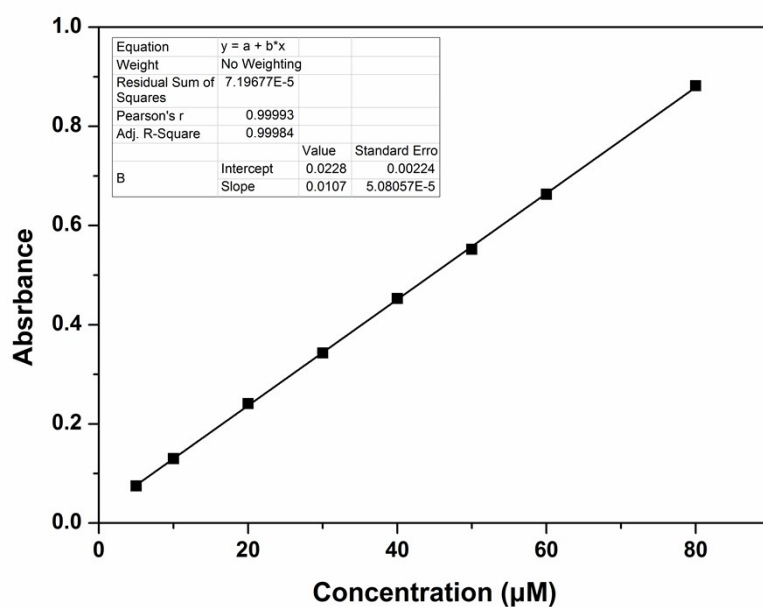

**Figure S1.** The standard curve of SH-PEG-OME quantified by Ellman method.

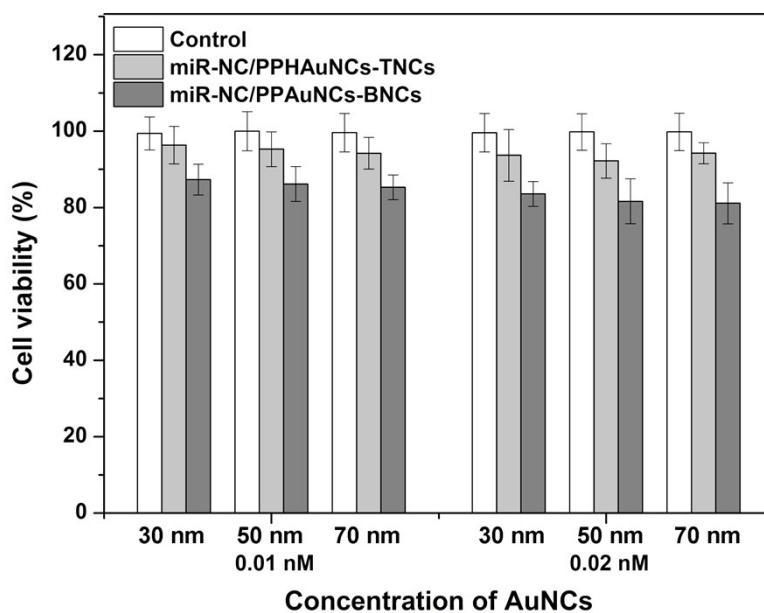

**Figure S2.** Cell viability of BEL-7402 cells incubated with different concentrations of different-sized miR-NC/PPHAuNCs-TNCs and miR-NC/PPAuNCs-BNCs for 48 h.

Each bar was presented as the mean  $\pm$  SD (n = 4).

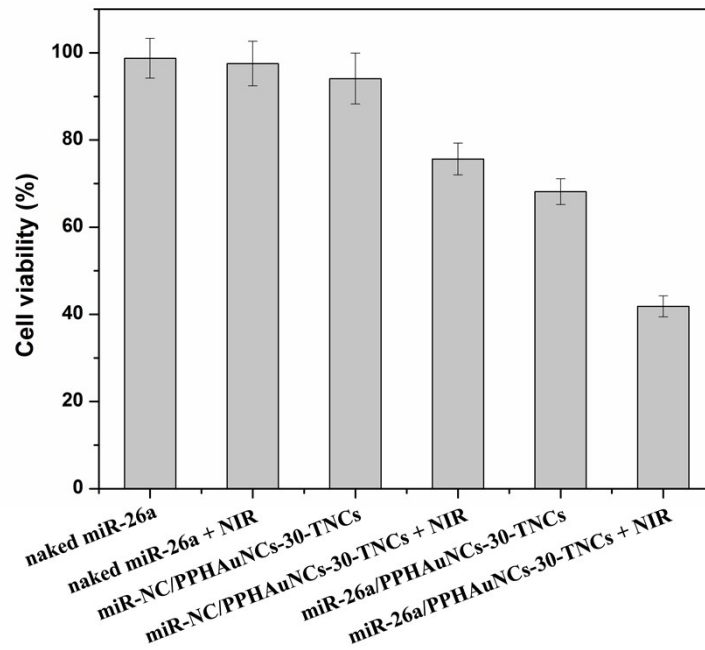

**Figure S3.** Cytotoxicity of BEL-7402 cells incubated with different formulations: naked miR-26a, naked miR-26a + NIR, miR-NC/PPHAuNCs-30-TNCs, miR-NC/PPHAuNCs-30-TNCs + NIR, miR-26a/PPHAuNCs-30-TNCs and miR-26a/PPHAuNCs-30-TNCs + NIR for 24 h at 37 °C. At the 6 h incubation, the groups with NIR irradiation used laser (808 nm, 1.25 W cm<sup>-2</sup>, 5 min) to achieve photothermal therapy. The concentration of miRNAs (miR-NC and miR-26a) was 80 nM. Each bar was presented as the mean ± SD (n = 4).
